# Supplementary material
Source: HighWire-hosted journal article supplement (https://bmjopensem.bmj.com/content/6/1/e000664)
Supplement: inline-supplementary-material-9 [file inline-supplementary-material-9.pdf]

Supplementary material 9. Study findings (i.e. effect sizes and risk of bias) for articles reporting on the effect of the intervention on quality of life on the long- and short-term. Findings are stratified by intervention component (active referral, a multi-component intervention with multiple elements and e/mHealth). Individual study as well as pooled effects are presented. SE = standard error; CI = confidence interval; IV = Inverse variance.

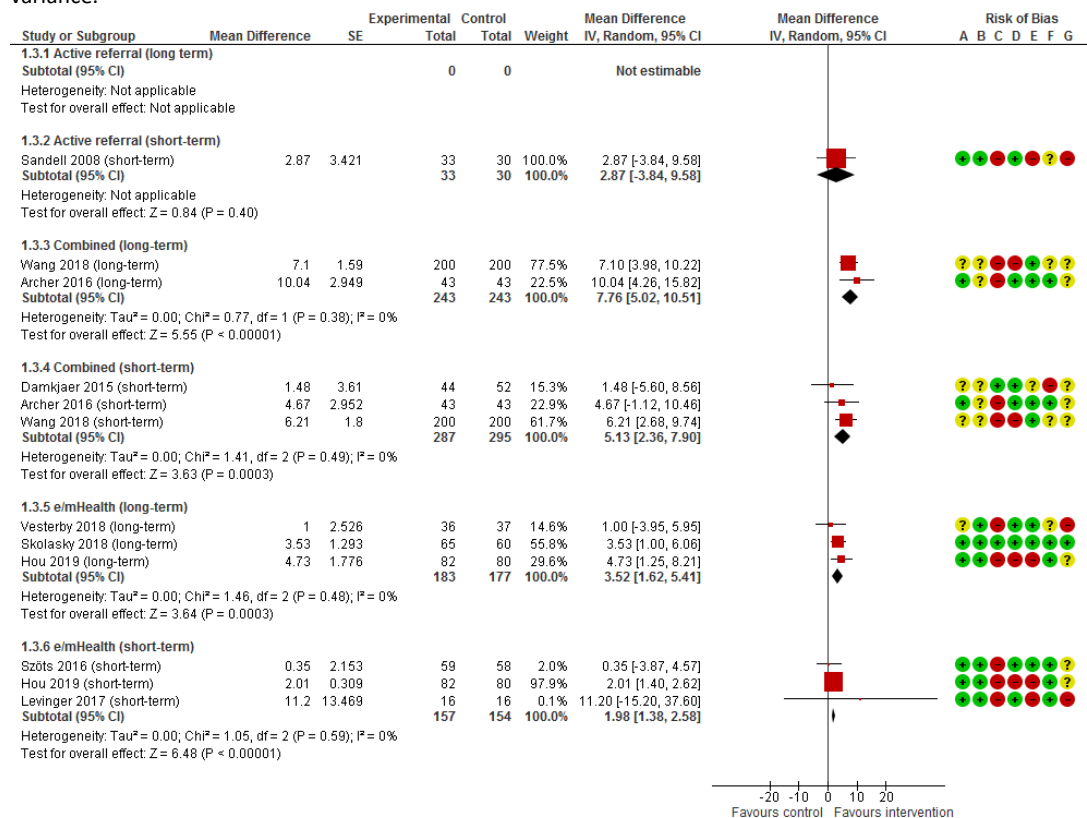

**Risk of bias legend**

- (A) Random sequence generation (selection bias)
- (B) Allocation concealment (selection bias)
- (C) Blinding of participants and personnel (performance bias)
- (D) Blinding of outcome assessment (detection bias)
- (E) Incomplete outcome data (attrition bias)
- (F) Selective reporting (reporting bias)
- (G) Other bias
